# Supplementary material
Source: publisher site journal article supplement (https://www.dovepress.com/article/546711)
Supplement: Supplementary file 1 [file 546711%20Revised%20Supplementary%20Table%201%20-%20Re-revised.doc]

|  | Not satisfied  1 point | Basically satisfied  2 points | Relatively satisfied  3 points | Very satisfied  4 points |
| --- | --- | --- | --- | --- |
| Consistency between purchase and sale of materials |  |  |  |  |
| Timeliness of material distribution |  |  |  |  |
| Accuracy of information |  |  |  |  |
| Management and ease of use |  |  |  |  |
| Operative room efficiency |  |  |  |  |

Supplementary Table 1. Satisfaction survey

Note: A 4-point Likert scale (1= not satisfied to 4= very satisfied). The total score range is 5-20 points, of which 15-20 points are satisfactory, 9-14 points are general, and less than 9 points are not satisfied
